# Supplementary material for: Effect of planting density and harvesting date on yield and quality of Artemisia argyi
Source: PeerJ. 2026 Jan 13;14:e20565. doi: 10.7717/peerj.20565 (PMC12810393; doi:10.7717/peerj.20565)
Supplement: Supplemental Information 1 — Lowercase letters indicate a significant difference between different densities at the same harvesting dates (p < 0.05), and uppercase letters indicate a significant difference between different harvesting dates at the same density (p < 0.05). [file peerj-14-20565-s001.xlsx]

## Sheet: Table S1
Supplementary Table S1. Effect of planting density and harvesting date on yield and quality of Artemisia argyi
Index	Treatment	June 6th	June 14th	June 22nd	June 30th	July 8th
Moxa yield rate	D1	0.225±0.010Aa	0.218±0.002Aa	0.201±0.004Ba	0.200±0.004Ba	0.190±0.003Ca
	D2	0.210±0.002ABa	0.215±0.003Aab	0.208±0.006BCa	0.199±0.011Ca	0.183±0.003Da
	D3	0.170±0.003Db	0.204±0.003Bab	0.215±0.006Aa	0.206±0.004ABa	0.193±0.010Ca
	D4	0.143±0.004Db	0.198±0.006BCb	0.216±0.004Aa	0.205±0.006ABa	0.192±0.007Ca
Volatile oil content (mL)	D1	0.21±0.02Bb	0.31±0.01Aa	0.3±0.02Aa	0.33±0.02Ab	0.33±0.02Aa
	D2	0.24±0.01Cb	0.32±0.01Ba	0.32±0.03Ba	0.35±0.01Ab	0.34±0.01Ba
	D3	0.25±0.02Bab	0.33±0.03Aa	0.33±0.04Aa	0.36±0.02Ab	0.37±0.04Aa
	D4	0.27±0.02Ca	0.33±0.01Ba	0.35±0.02Bb	0.40±0.02Aa	0.35±0.01Ba
Eucalyptol content (%)	D1	0.070±0.003Ed	0.09±0.001Dd	0.103±0.002Cd	0.119±0.003Ac	0.115±0.001Bc
	D2	0.075±0.0005Dc	0.096±0.001Cc	0.115±0.004Bc	0.125±0.005Ac	0.121±0.003Ab
	D3	0.083±0.001Db	0.103±0.002Cb	0.142±0.002Aa	0.143±0.005Ab	0.122±0.002Bb
	D4	0.088±0.002Da	0.112±0.002Ca	0.135±0.004Bb	0.155±0.001Aa	0.134±0.008Ba
Borneol content (%)	D1	0.038±0.003Cb	0.042±0.003BCb	0.048±0.002Bd	0.058±0.005Ab	0.04±0.001Cb
	D2	0.040±0.002Dab	0.048±0.001Cab	0.053±0.0003Bc	0.062±0.002Aab	0.047±0.006Cab
	D3	0.045±0.003Ca	0.055±0.003BCa	0.063±0.001ABa	0.069±0.003Aa	0.052±0.005Cab
	D4	0.039±0.004Bab	0.053±0.006ABa	0.059±0.002Ab	0.062±0.007Aab	0.044±0.006Ba
Combustion calorific value of moxa (cal/g)	D1	4124.00±68.51ABa	4178.33±25.11Aa	4153.67±15.82Aa	4128.67±29.01ABa	4092.67±13.87Ba
	D2	4051.67±46.88Cab	4083.67±26.86BCb	4112.33±32.32ABa	4150.33±29.67Aa	4054.67±13.05Cab
	D3	4007.67±63.89Bb	4052.33±13.58ABbc	4052.00±20.66ABb	4089.00±60.01Aa	4011.67±4.04Bb
	D4	3981.67±13.32Bb	4013.00±18.33ABc	4068.67±19.86Ab	4005.33±17.24Bb	3910.67±66.98Cc
Total flavonoid content (mg/g)	D1	63.72±2.40Ca	80.36±2.25ABb	78.93±3.94Aa	76.61±3.97ABa	70.15±2.58BCa
	D2	55.75±4.09Db	93.78±0.19Aa	85.11±4.13Ba	80.03±2.61Ba	72.59±2.93Ca
	D3	52.54±3.80Cb	81.29±4.73Ab	63.56±5.09Bb	60.31±6.56Bb	52.54±1.93Cb
	D4	43.47±2.48Cc	76.00±5.96Ab	58.68±3.53Bb	57.42±7.85Bb	56.00±0.93Bb
polyphenol content (mg/g)	D1	14.93±1.43Ca	16.38±1.43Cb	20.73±1.17Ba	17.06±1.04Ca	17.06±1.26Ca
	D2	13.58±0.58Da	20.53±1.16Ba	17.35±1.04Cb	15.22±0.60Da	14.74±1.45Db
	D3	11.17±0.44Db	17.25±1.31Bab	15.13±0.33Cc	10.78±1.17Db	10.01±0.33Dc
	D4	9.14±1.46Db	16.67±2.86Bb	13.78±1.21Cc	9.91±1.17Db	11.46±1.21CDc
Polysaccharide content (mg/g)	D1	35.29±0.83Ab	26.91±2.64Ba	22.89±2.87CDa	21.08±0.58DEa	17.48±2.24Ea
	D2	42.61±4.42Aa	24.64±3.91BCa	21.02±3.03CDab	19.08±1.37DEa	15.53±1.46Eab
	D3	33.75±1.15Ab	22.33±1.37Ba	19.87±2.59BCab	18.96±1.67Ca	14.61±1.46Dab
	D4	27.09±3.93Ac	22.12±0.94Ba	17.77±1.22Cb	14.53±2.10Cb	14.28±0.95Cb
Footnote: Lowercase letters indicate a significant difference between different densities at the same harvesting dates (P<0.05), and uppercase letters indicate a significant difference between different harvesting dates at the same density (P<0.05).
