# Supplementary material for: Effect of planting density and harvesting date on yield and quality of Artemisia argyi
Source: PeerJ. 2026 Jan 13;14:e20565. doi: 10.7717/peerj.20565 (PMC12810393; doi:10.7717/peerj.20565)
Supplement: Supplemental Information 2 [file peerj-14-20565-s002.xlsx]

## Sheet: growth index
	Plant height/cm				Crown breadth/cm				Dead leaf height/cm				Number of effective leaves on main stem/ slice				Stem diameter/mm				Blade spacing/cm
	D1	D2	D3	D4	D1	D2	D3	D4	D1	D2	D3	D4	D1	D2	D3	D4	D1	D2	D3	D4	D1	D2	D3	D4
June 6th	120.3	107.1	98.3	91.5	26.4	36.9	38.15	37.7	21.3	15.7	15.8	13.6	26	25	30	30	6.01	6.76	6.46	8.73	10.6	8.8	8.1	7.2
	121.4	106	100.2	90.6	28.6	31	33.5	43	23.2	19	15.7	15.1	22	26	33	32	6.78	7.51	6.71	7.72	10.8	9.8	8.9	7.1
	123.2	106.4	97.2	95.1	30.5	33.8	39.05	38	22.7	16.4	13.4	15.3	25	25	29	32	6.64	7.29	7.82	8.43	11.9	8.2	7.9	6.8
	115.1	99.5	103.3	81.5	29.95	32.75	33	37.2	21	17	17.5	15.5	27	29	33	27	6.27	7.04	7.58	8.35	10.1	9.4	7.8	7.3
	117.4	105.6	94.1	89.5	29.2	41.2	35.05	40	20.8	16.4	14.5	14.9	21	28	32	32	6.42	6.4	7.89	7.19	10.6	9.2	7.9	6.8
	109	104.7	95.4	96.8	26.5	38.5	41.5	42.9	23.5	20	15.4	14.8	22	29	30	35	5.76	6.87	7.06	7.04	9.3	8.9	6.9	6.7
	112	106.5	94.1	92.8	26.5	38.5	39.3	41.2	22	18.4	16.5	17.5	21	26	30	32	5.98	6.75	7.85	7.96	9.5	9.9	8.7	6.9
	123.6	99.1	96.2	91.6	27.15	38.2	34.15	41.5	24.1	18.7	17.8	15.4	20	26	29	29	6.33	7.58	7.47	8.76	10.3	9.3	7.6	6.9
	122	95.2	89.2	89.4	30.8	31.5	42	35.5	22	15.7	15.3	15.6	21	27	27	28	6.68	6.68	6.55	8.41	10.8	9.6	8.3	6.4
June 14th	128.9	114.6	101.2	111.2	31.55	33.95	37.05	43.15	24.8	21.9	16.2	15.9	31	33	33	33	6.34	7.08	7.73	8.16	9.8	9.2	8.3	8.9
	134.8	115.8	104.1	107.1	30.35	41.7	40.9	40.45	27.4	20.9	16.2	18.3	26	34	31	35	6.19	7.05	7.42	7.81	10.6	10.5	7.3	8.3
	137.7	130.5	108.4	94.2	29.45	39.7	42.05	41.8	28.3	19.8	15.2	17.7	28	38	35	34	6.32	6.66	6.98	8.71	10.7	8.8	7.8	8.4
	130.7	109.3	101.5	95.6	28.65	36.5	40.15	45.45	29.9	19.5	14.4	14.6	30	30	34	31	6.06	6.99	7.31	7.05	12.1	10.4	8.2	7.2
	133.2	124.5	105.4	95.1	29.15	32.35	41	41.15	32.1	23.9	14.1	15.6	25	34	33	31	6.86	7.16	7.26	8.02	9.9	9.3	8.9	7.1
	138.1	111.3	109.5	98.3	32.35	34.25	38.55	44.95	32.7	18.5	18.2	16.8	26	29	30	32	6.64	7.49	7.27	8.22	10.6	10	8.8	7.4
	135.5	109.4	104.2	99.1	32.25	38.9	41.75	46.2	25.7	19.5	16.2	14.3	27	31	35	31	6.46	6.94	7.41	7.67	10.5	10.3	7.3	6.6
	137.2	113.3	105.1	104.4	31.3	36.25	38.15	41.45	29.8	20.6	15.6	17.9	27	31	34	32	6.37	6.82	7.3	9.2	9.9	9.7	8.3	7.2
	133.9	102.9	100.5	96.1	30.25	38.85	39.6	43.35	27.2	20.1	17.8	15	29	32	30	30	6.53	7.16	7.11	7.55	11.9	9.4	7.3	6.2
June 22nd	145.5	126.4	109.4	108.9	31.65	37.45	38.05	46.4	38.3	25.8	22.6	22.4	28	37	33	40	6.72	7.1	8.09	8.32	10.6	10.2	9.2	7.3
	146.2	123.6	118.4	111.8	32.95	35.65	38.5	47.75	35.2	27.4	20.2	20.6	34	36	37	38	6.39	6.68	7.87	8.27	11.6	10.1	7.7	6.9
	136.1	130.3	111.1	114.3	33.9	34.1	43.7	44.35	39	30.1	25.8	19.1	32	33	38	39	6.38	7.22	7.88	8.15	10.8	10.4	8.8	7.2
	142	113.1	118.2	118.2	30.45	38.15	40.05	42.95	34	24.8	20.7	24.9	30	33	36	34	6.28	6.62	7.76	8.33	12.2	8.7	8.2	7.3
	134.1	131.8	108.5	112.1	31.95	41.65	44.45	45.65	32.1	26.4	24.7	19.4	26	37	37	39	6.81	7.36	8.05	8.09	12	9.4	8.4	6.5
	131.1	119.1	117.2	109.3	32.15	40.3	45.95	42.55	32.6	24.2	16.8	19.9	30	37	40	40	6.67	6.83	8.18	7.99	10.1	9.8	8.1	7.9
	142.6	123.1	115.4	112.9	27.8	39.25	43.55	47.8	34.1	25.9	21.7	24.1	25	33	36	39	6.71	7.5	7.49	8.26	10.2	8.7	7.4	7.6
	138.3	114.1	116.3	110.9	33.45	40.05	44.95	40.85	35.5	27.2	24.2	19.3	31	36	33	33	6.85	7.24	7.42	8.06	10.7	10.8	7.8	7.4
	144.4	121.1	113.2	108.6	32.85	36.95	38.65	44.5	31.8	22.7	20.6	19.1	30	32	36	35	7.41	7.12	8.02	8.15	11.9	9.74	7.7	7.24
June 30th	149.1	131.7	121	126.7	33.75	37.1	40.4	45.05	36.6	26.9	24.8	24.9	36	37	38	40	6.37	6.77	7.68	8.45	12.4	10.2	9.7	7.2
	152.6	136.1	123.1	123.7	34.65	35.6	41.75	44.35	45.4	32.7	24.5	21.8	31	40	42	41	6.83	7.52	7.71	9.11	10.2	9.6	8.9	7.6
	150.8	131.1	130.7	119.4	32.55	36.4	42.15	46.15	37.9	33.6	27.1	19.2	31	36	39	39	6.92	6.88	8.62	9	11.9	10.1	8.3	7.2
	153.1	129.8	132.3	128.1	30.8	40.95	48.65	44.15	41.4	35.3	26.9	23.6	36	34	35	40	6.51	6.38	7.43	8.31	10.3	9.8	8.2	7.7
	147.9	136.8	125.9	128.3	30.4	37.35	40.75	45.4	42.1	30.4	26.2	23.7	31	35	36	40	7.03	7.22	7.42	8.58	10.5	9.4	9.4	7.3
	142.2	133.5	125.4	120.2	33.05	47	44.15	46	38.2	33.1	26.1	24.1	33	40	39	39	6.98	6.55	7.89	8.34	10.6	9.1	8.6	7.1
	140.6	125.6	134.3	123.8	33.455	35.7	47.35	49.15	37.4	32.6	25.9	23.4	33	36	36	35	7.21	7.38	7.21	7.64	10.3	9.3	8.9	7.9
	147.9	128	126.9	126.4	28.8	39.25	42.5	44.25	36.8	27.6	26.9	22.8	37	32	40	42	6.44	7.7	7.09	7.78	11.6	9.8	8.2	7.2
	148.4	130.2	130.9	120.5	32.5	37.65	44.3	46.45	41.7	31.6	23.2	23.2	29	37	40	41	6.94	7.72	8.39	7.88	10.3	10.9	7.3	8.1
July 8th	153.5	147.5	139.4	125.5	35.25	39.75	42.9	50.25	39.7	33.5	26.2	24.6	36	36	40	42	6.37	6.82	7.96	8.13	9.4	8.6	8.2	6.9
	151.4	144.1	140.9	136.5	32.1	41.75	47.55	50.6	40.5	36.3	26.6	26.5	32	34	38	47	6.19	6.78	7.7	8.04	9.1	8.6	8.6	7.2
	148.8	145.1	135.9	124.3	33.85	41.95	45.7	48.5	46.5	32.1	28.5	26.5	35	41	43	46	6.53	7.04	7.68	7.99	10.6	9.1	8.4	7.3
	153.5	137.5	147.1	122.5	34.5	42.5	45.05	45.7	41.1	34.5	28.3	20.5	32	43	43	43	6.26	6.84	7.74	7.74	10.6	9.2	7.8	7.8
	157.8	139.1	140.7	136.5	32.8	39.5	40.45	48.65	43.3	37.8	27.6	23.9	34	43	42	42	6.18	7.02	7.32	7.81	9	8.9	8.7	7.7
	153.9	138.8	139.1	133.2	34.05	38	45.35	45.5	44.3	35	28.2	27.5	35	40	45	43	6.59	7.14	7.71	7.88	9.2	9.1	7.6	7.9
	154.4	147.9	145.5	132.4	35.25	40.85	44.65	44.05	40.5	33.2	27.5	26.8	38	41	46	41	6.54	6.93	7.62	7.78	9.3	8.3	8.3	6.7
	155.8	139.5	141.5	137.5	32.15	38.35	48.55	49.05	42.7	32.5	33.2	23.7	35	43	41	43	6.41	7.05	7.7	8.29	9.8	8.8	7.5	7.2
	149.8	150.8	137.5	138.5	35.25	36	43.8	43.6	41.6	34.2	29.5	27.6	39	41	44	42	6.01	7.04	7.37	7.71	10.4	9.2	8.9	7.8

## Sheet: Drying rate
Drying rate
	D1	D2	D3	D4
June 6th	0.290315	0.334254	0.337678	0.342889
	0.294393	0.323011	0.357311	0.381233
	0.2605	0.326777	0.313545	0.339259
	0.266363	0.31755	0.325467	0.390113
	0.27449	0.317727	0.345257	0.361568
	0.335226	0.321525	0.368881	0.377436
June 14th	0.33595	0.301377	0.370929	0.36684
	0.308313	0.350853	0.333049	0.406686
	0.247083	0.368671	0.402258	0.381093
	0.330463	0.329715	0.377756	0.377881
	0.264418	0.31259	0.368602	0.397011
	0.299567	0.327559	0.381369	0.428571
June 22nd	0.300722	0.358737	0.41999	0.447653
	0.382724	0.332079	0.37813	0.402611
	0.365678	0.363006	0.370109	0.401312
	0.311008	0.393244	0.429338	0.431395
	0.329139	0.371571	0.353685	0.396103
	0.296677	0.362397	0.355614	0.412946
June 30th	0.308559	0.34546	0.381563	0.429477
	0.301969	0.30196	0.439682	0.452835
	0.339797	0.312712	0.35708	0.352833
	0.340349	0.311603	0.3725	0.384697
	0.322873	0.31923	0.388743	0.431301
	0.268577	0.359583	0.331147	0.388973
July 8th	0.298687	0.348487	0.3863	0.356378
	0.314792	0.323222	0.308196	0.393142
	0.278006	0.317361	0.361403	0.373646
	0.31644	0.292845	0.343519	0.409256
	0.302963	0.299452	0.371925	0.327701
	0.310962	0.343376	0.319272	0.382214

## Sheet: Yield
Yield /kg ha-1
	D1	D2	D3	D4
June 6th	3007.65	3014.49	2675.43	2431.13
	3101.79	2869.08	2488.12	2314.28
	2913.51	2888.73	2544.5	2399.69
June 14th	3582.71	3211.04	3135.92	2921.28
	3335.69	3146.16	2923.48	2751.52
	3498.2	3238.6	2957.7	2762.9
June 22nd	4533.05	3928.33	3560.49	3251.28
	4398.35	3605.79	3530.26	3042.17
	4423.7	3753.68	3439.25	3104.8
June 30th	4825.34	3963.48	4008.92	3232.74
	4780.12	4035.21	3748.33	3550.47
	4598.79	3952.86	3760.95	3589.74
July 8th	4888.54	4158.39	4071.02	3529.26
	4620.37	4007.02	3800.28	3620.14
	4845.64	4332.44	3825.55	3445.4

## Sheet: quality index
	Moxa yield rate				Volatile oil content (mL)				Eucalyptol content (%)				Borneol content (%)				Combustion calorific value of moxa (cal/g)				Total flavonoid content (mg/g)				polyphenol content (mg/g)				Polysaccharide content (mg/g)
	D1	D2	D3	D4	D1	D2	D3	D4	D1	D2	D3	D4	D1	D2	D3	D4	D1	D2	D3	D4	D1	D2	D3	D4	D1	D2	D3	D4	D1	D2	D3	D4
June 6th	0.0213	0.0208	0.0173	0.014	0.2	0.24	0.25	0.25	0.071458	0.0755802	0.0817296	0.0885128	0.0339311	0.03925	0.0408944	0.0361496	4192	4105	4041	3985	65.6744	54.5721	48.2279	40.7857	13.2928	14.1616	14.1616	10.6864	36.2053	45.0679	35.0195	31.462
	0.0231	0.0211	0.017	0.0148	0.23	0.23	0.27	0.28	0.0715426	0.0756268	0.0828813	0.0861408	0.0389924	0.0423782	0.0473972	0.0430156	4055	4017	4048	3967	61.0382	52.376	55.4261	43.9578	15.6096	13.5824	13.5824	8.94874	35.0819	45.2551	33.4592	25.9697
	0.023	0.021	0.0168	0.0142	0.21	0.24	0.24	0.29	0.066836	0.0747664	0.0837518	0.0906839	0.0406474	0.0388981	0.0456422	0.0377827	4125	4033	3934	3993	64.4543	60.3062	53.9621	45.6658	15.8992	13.0032	13.0032	7.79033	34.5826	37.516	32.7727	23.8477
June 14th	0.0219	0.0218	0.0202	0.0191	0.32	0.32	0.3	0.33	0.0902277	0.0961368	0.105254	0.11009	0.0418998	0.0492323	0.0560299	0.0484116	4206	4095	4044	3993	77.8747	93.9791	85.6829	82.5108	14.7408	19.3745	17.3472	15.32	23.9725	29.1528	23.7229	22.1626
	0.022	0.0215	0.0204	0.0203	0.31	0.33	0.33	0.32	0.0893593	0.0970949	0.101836	0.110078	0.0388281	0.0476403	0.0561176	0.051595	4172	4103	4068	4017	82.2668	93.7351	76.2887	74.7026	17.3472	21.6913	15.8992	14.7408	29.0903	22.5371	20.9768	21.164
	0.0216	0.0212	0.0207	0.0201	0.3	0.31	0.35	0.34	0.0904664	0.0944697	0.103407	0.114372	0.0439155	0.0469383	0.0513829	0.0594303	4157	4053	4045	4029	80.9248	93.6131	81.9008	70.7985	17.0576	20.5329	18.5056	19.9537	27.6549	22.225	22.2874	23.0364
June 22nd	0.0204	0.0214	0.0209	0.0217	0.28	0.35	0.32	0.37	0.103342	0.112278	0.142597	0.135631	0.0454847	0.053502	0.0620271	0.0576561	4171	4149	4071	4046	75.3126	80.6808	59.3302	55.5481	19.6641	18.216	15.32	14.7408	26.0946	24.347	22.8491	18.1058
	0.0202	0.0202	0.0216	0.0211	0.31	0.3	0.33	0.35	0.104782	0.112217	0.144057	0.130684	0.0494382	0.0535199	0.0642963	0.0581062	4140	4088	4030	4083	78.3627	88.855	69.2125	57.9882	21.9809	17.6368	14.7408	14.1616	22.0378	20.2902	18.1682	18.7923
	0.0196	0.0207	0.022	0.0219	0.32	0.32	0.35	0.34	0.101545	0.119489	0.140097	0.137865	0.0486612	0.0530405	0.0617241	0.0621211	4150	4100	4055	4077	83.1208	85.8049	62.1363	62.5023	20.5329	16.1888	15.32	12.424	20.5399	18.4178	18.6051	16.4207
June 30th	0.0204	0.0212	0.0204	0.021	0.35	0.36	0.37	0.42	0.122609	0.129765	0.147592	0.155224	0.0614456	0.0634422	0.0674925	0.069003	4128	4154	4025	3990	80.5588	82.9988	56.8901	48.3499	16.768	14.7408	10.1072	9.23834	21.7257	20.415	17.4193	12.1142
	0.0199	0.0194	0.0206	0.0199	0.33	0.34	0.36	0.38	0.118103	0.118977	0.143242	0.154121	0.0526169	0.0602127	0.0726646	0.0613285	4158	4119	4144	4024	72.6286	78.9727	67.8704	61.8923	16.1888	15.0304	12.1344	9.23834	20.6023	19.1668	20.7271	15.5469
	0.0197	0.0191	0.0209	0.0205	0.32	0.35	0.34	0.4	0.116873	0.126083	0.138476	0.154218	0.059613	0.0630661	0.0682061	0.0549607	4100	4178	4098	4002	76.6547	78.1187	56.1581	62.0143	18.216	15.8992	10.1072	11.2656	20.9143	17.6689	18.7299	15.9214
July 8th	0.0189	0.018	0.02	0.0193	0.31	0.33	0.32	0.36	0.115434	0.118003	0.123765	0.126082	0.0394158	0.0411297	0.0559595	0.0491539	4108	4041	4016	3871	72.8726	75.4346	54.2061	57.0121	15.6096	16.1888	10.3968	10.1072	14.9228	15.2348	16.2958	15.2972
	0.0194	0.0185	0.0182	0.0198	0.34	0.35	0.4	0.35	0.113459	0.120558	0.120517	0.135012	0.0420242	0.0533409	0.0541113	0.0367062	4081	4067	4008	3873	69.8225	69.5785	50.424	55.7921	17.6368	13.2928	9.81755	12.424	19.1044	17.1072	13.8618	13.4249
	0.0188	0.0183	0.0197	0.0185	0.35	0.33	0.38	0.35	0.114811	0.124386	0.120517	0.142011	0.0395928	0.0462007	0.0467576	0.0446737	4089	4056	4011	3988	67.7484	72.7506	52.986	55.1821	17.9264	14.7408	9.81755	11.8448	18.4178	14.2362	13.6745	14.1114
